# Supplementary material
Source: Springer Nature journal article supplement (https://www.springermedizin.de/resource/supplementary/13569_2014_68_MOESM8_ESM.pdf/9676766)

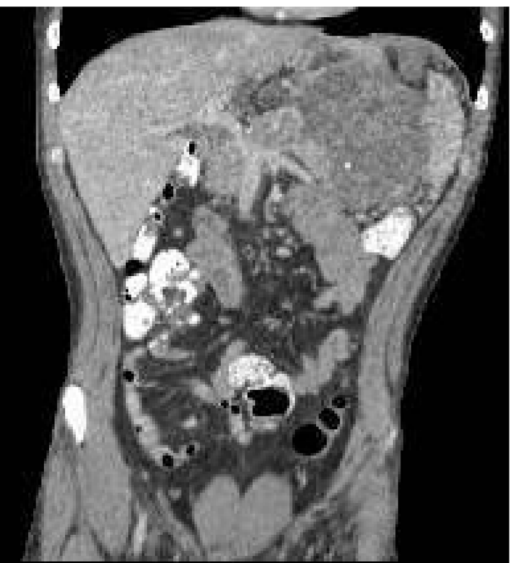

Coronal view

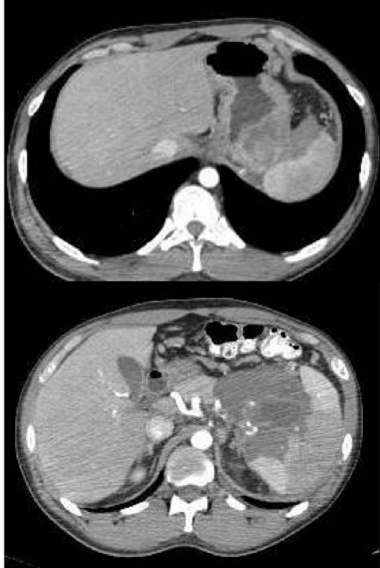

Axial views

CT following Imatinib therapy

Supplement: MOESM8 [file 9676766]
